# Supplementary material
Source: PubMed Central journal article supplement (PMC4210278)
Supplement: pnas.201407909SI.pdf [file pnas.201407909SI.pdf]

# Supporting Information

Kiiski et al. 10.1073/pnas.1407909111

## SI Results and Discussion

In addition to the *FANCM* c.5101C>T variant, five other variants were included in the final analysis. Combining the phase I, II, and III genotyping, the *SLX4* c.2484G>C missense variant and the *MPG* c.40-1G>T splicing variant had similar frequencies between cases and controls (Table S2). The *FANCA* c.4228T>G missense variant was detected in two familial breast cancer cases (0.2%) and the *RUVBL1* c.950G>A missense variant in three breast cancer cases [two familial (0.2%) and one unselected (0.1%)] and one ovarian cancer case (0.2%), but not in any of the controls. The frequency of the *NEIL1* c.314dupC was similar between all breast cancer cases and controls (0.6% and 0.5% in the Helsinki dataset, respectively, and 0.4% for cases and controls in the Tampere dataset), with a somewhat higher frequency among the Tampere sporadic cases [1.7%; OR = 4.57, 95% CI = 1.17–17.75,  $P = 0.016$  vs. controls]. One of the unselected breast cancer patients in the Helsinki dataset was homozygous for the c.314dupC mutation. Results for the other subgroups are nevertheless consistent between both datasets, and no statistically significant difference between cases and controls is observed (Table S2). In addition, frequencies for the *BARD1* c.2282G>A and *PAXIP1* c.803C>T missense variants after phase II genotyping were similar to phase I frequencies or too rare for statistical assessment in our dataset, and thus these variants were excluded from further analysis.

Biallelic mutations in the *SLX4* gene have recently been found to cause FA-P, a new subtype of FA (1). Landwehr et al. (2) further studied *SLX4* association with hereditary breast cancer. They identified four previously undescribed variants, but none of them clearly associated with breast cancer. However, a minor contribution for rare variants cannot be ruled out, and, again, larger datasets are needed for more accurate prediction. The *FANCA* c.4228T>G variant has not been previously reported in the FA Mutation Database ([www.rockefeller.edu/fanconi/mutate](http://www.rockefeller.edu/fanconi/mutate)), even though *FANCA* is the most mutated gene in FA, with more than 350 unique mutations reported (3). The role of *FANCA* c.4228T>G as a putative breast cancer-predisposing allele warrants further studies. *RUVBL1* is overexpressed in several types of cancer, associates with c-Myc transformation, is a component of chromatin remodeling complexes, and participates in DNA repair (4). Further studies are needed to evaluate the contribution of *RUVBL1* to breast cancer predisposition. *NEIL1* is an S-phase regulated protein that excises base lesions from ssDNA, and hypothetically interacts with replication-associated repair and is possibly connected with FA repair pathway. Levels of *NEIL1* protein are greatly diminished from cells depleted for FA proteins, but the exact mechanism or correlation of *NEIL1* and FA pathway remains to be further investigated (5).

Truncating and missense mutations in *BARD1* have been identified in breast and ovarian cancer families (6, 7), but the contribution of the gene to breast cancer predisposition remains unclear. The missense variant c.2282G>A identified in our study was in silico predicted to be pathogenic, but it was detected in similar frequency among cases and controls. For *PAXIP1* c.803C>T missense variant, the size of our dataset was not sufficient to disclose the difference in frequencies between cases and controls, and thus the association with breast cancer cannot be excluded.

## SI Materials and Methods

**Subjects.** *Helsinki breast cancer series.* The unselected breast cancer patient series from Helsinki was collected at Helsinki University Central Hospital Department of Oncology in 1997–1998 and 2000

(884 patients, including 79% of all consecutive newly diagnosed breast cancer cases during the collection periods) (8, 9) and Department of Surgery in 2001–2004 (986 patients, including 87% of all consecutive newly diagnosed breast cancer cases) (10). Altogether, 1,730 female patients with invasive breast cancer were included in the analysis. The additional familial breast cancer patients were collected at Helsinki University Central Hospital Departments of Clinical Genetics and Oncology (10, 11). When combining the additional familial cases and the unselected series, 524 patients had strong family background with at least three breast or ovarian cancers among first- or second-degree relatives, including the proband, and 568 patients had one first-degree relative affected with breast or ovarian cancer. The samples were genomic DNA isolated from the peripheral blood of the patients. All patients with strong family background were tested negative for *BRCA1/2* mutations, and the patients with one affected relative were tested negative for the Finnish *BRCA1/2* founder mutations as previously described (12–14). The genealogies were confirmed through population registries and cancer diagnoses through the Finnish Cancer Registry and hospital records. Information on ER and progesterone receptor status was collected from pathology reports (15). *HER2* status was based on immunohistochemistry and gene amplification with chromogenic in situ hybridization on breast cancer tissue microarrays (16).

*Tampere breast cancer series.* The unselected breast cancer series from Tampere was collected at Tampere University Hospital as previously described (8, 10), and an additional 336 incident cases were collected in 1996–2004 at Tampere University Hospital. Only invasive cases were included in the analysis. The samples were genomic DNA isolated from peripheral blood.

*Helsinki ovarian cancer series.* An unselected ovarian cancer series ( $n = 233$ ) was collected at Helsinki University Central Hospital Department of Obstetrics and Gynecology in 1998 as previously described (17). The patients had been treated for invasive epithelial ovarian carcinoma at Helsinki University Central Hospital between 1989 and 1998, and the blood samples were collected in routine follow-up visits to the clinic during 1998 from those patients who were still alive. Additional DNA samples from blood and tumor tissue samples were prospectively collected from patients treated for ovarian cancer at Helsinki University Central Hospital Department of Obstetrics and Gynecology between 1998 and 2006, totaling 569 samples (345 genomic DNA and 204 tumor DNA) in the analysis.

*Iceland breast cancer series.* The unselected breast cancer series from Iceland consisted of 965 breast cancer cases diagnosed in the period 1987–2004 at Landspítali University Hospital. Among these patients, 92 had a family history of breast cancer (first- and/or second-degree relative diagnosed with breast cancer) and were tested negative for the Icelandic *BRCA1/2* founder mutations (18). The genealogies were conducted by the Genetic Committee of the University of Iceland, and cancer diagnoses were conducted through the Department of Pathology of Landspítali University Hospital and the Icelandic Cancer Registry. Genomic DNA samples were isolated from blood of the patients. The study was approved by the Icelandic Data Protection Authority (reference no. 20010505239 and later amendments) and the National Bioethic Committee (reference no. 99/051-B1/B2 and later amendments).

*Population controls.* For controls, we genotyped DNA samples from healthy female blood donors from the same geographical regions: 1,274 from Helsinki and 816 from the Tampere region.

**Exome Data Analysis.** FASTQ-files were quality checked with FASTX-toolkit ([hannonlab.cshl.edu/fastx\\_toolkit/](http://hannonlab.cshl.edu/fastx_toolkit/)). Sequence reads were aligned to the hg19 human genome build using Burrows-Wheeler Aligner software (version 0.5.9) (19). Sequence realignment and duplicate detection was performed with Picard and Samtools (20). Samtools was used for SNV and indel calling. Integrative Genomics Viewer (21) was used for metrics computing. SnpSift (22) and SnpEff were used for dbSNP and variant effect annotation.

**Sanger Sequencing.** DNA extracted from blood was amplified by PCR (Table S3) with Biotools DNA polymerase (Biotools). Primers for PCR were designed with Primer3 ([frodo.wi.mit.edu/primer3](http://frodo.wi.mit.edu/primer3)) using NCBI37/Hg19 as a reference sequence. The PCR products were visualized on 2% (wt/vol) agarose gel and purified with ExoSAP-IT (Affymetrix). ABI BigDyeTerminator 3.1 Cycle Sequencing kit (Applied Biosystems) was used for sequencing reactions, and the sequencing was performed at FIMM (University of Helsinki) by using 3730xl DNA Analyzer (Applied Biosystems). Sequence chromatograms were visualized with Variant Reporter (Applied Biosystems) and FinchTV software (Geospiza).

**Sequenom Genotyping.** The SNV genotyping with Sequenom MassARRAY system was performed by using iPLEX Gold assays (Sequenom) at FIMM (University of Helsinki).

**TaqMan Genotyping.** TaqMan real-time PCR was performed in a 7500 Fast RealTime PCR System or a 9800 Fast Thermal Cycler

by using TaqMan SNP Genotyping assays and TaqMan Genotyping MasterMix (Applied Biosystems). Genotype calling was performed with 7500 Fast RealTime PCR System and ABI Prism 7500 SDS software (version 1.4; Applied Biosystems). The *FANCM* c.5101C>T mutation was genotyped in the Icelandic breast cancer patients by using TaqMan SNP Genotyping assays and TaqMan Genotyping MasterMix. The PCR was run on a StepOne Real-Time PCR system (Life Technologies), and data were collected and analyzed with StepOne software (version 2.0; Life Technologies).

**Nonsense-Mediated mRNA Decay Analysis of *FANCM* c.5101C>T.** Quantitative allele-specific quantitative RT-PCR was performed for WT and c.5101C>T mutant *FANCM* alleles on RNA extracted from lymphoblastoid cells from a heterozygous carrier of the c.5101C>T variant, a noncarrier from the Finnish population, and five non-Finnish white noncarriers on a 7900HT system (Applied Biosystems). PCR primers were as follows: common *FANCM* reverse, AAATTCAGCGATGTCTGTTTGC; WT *FANCM* forward, CAAGCACTGTTAAGAAGAACAACGAC; and c.5101C>T mutant *FANCM* forward, GCAC-TGTTAAGAAGAACAACGAT. Both forward primers included a modification of the third nucleotide from the 3' end to promote allele-specific PCR. Experiments were repeated by using RNA from cells treated with cycloheximide (100 µg/mL) for 4 h to inhibit nonsense-mediated RNA decay. Levels of *FANCM* alleles were normalized relative to GAPDH levels.

- Kim Y, et al. (2011) Mutations of the SLX4 gene in Fanconi anemia. *Nat Genet* 43(2):142–146.
- Landwehr R, et al. (2011) Mutation analysis of the SLX4/FANCP gene in hereditary breast cancer. *Breast Cancer Res Treat* 130(3):1021–1028.
- Litim N, et al.; INHERIT BRCA2s (2013) Polymorphic variations in the FANCA gene in high-risk non-BRCA1/2 breast cancer individuals from the French Canadian population. *Mol Oncol* 7(1):85–100.
- Gorynia S, et al. (2011) Structural and functional insights into a dodecameric molecular machine - the RuvBL1/RuvBL2 complex. *J Struct Biol* 176(3):279–291.
- Macé-Aimé G, Couvé S, Khassenov B, Rosselli F, Saporbaev MK (2010) The Fanconi anemia pathway promotes DNA glycosylase-dependent excision of interstrand DNA crosslinks. *Environ Mol Mutagen* 51(6):508–519.
- De Brakeleer S, et al. (2010) Cancer predisposing missense and protein truncating BARD1 mutations in non-BRCA1 or BRCA2 breast cancer families. *Hum Mutat* 31(3):E1175–E1185.
- Ratajska M, et al. (2012) Cancer predisposing BARD1 mutations in breast-ovarian cancer families. *Breast Cancer Res Treat* 131(1):89–97.
- Syrjäkoski K, et al. (2000) Population-based study of BRCA1 and BRCA2 mutations in 1035 unselected Finnish breast cancer patients. *J Natl Cancer Inst* 92(18):1529–1531.
- Kilpivaara O, et al. (2005) Correlation of CHEK2 protein expression and c.1100delC mutation status with tumor characteristics among unselected breast cancer patients. *Int J Cancer* 113(4):575–580.
- Fagerholm R, et al. (2008) NAD(P)H:quinone oxidoreductase 1 NQO1\*2 genotype (P1875) is a strong prognostic and predictive factor in breast cancer. *Nat Genet* 40(7):844–853.
- Eerola H, Blomqvist C, Pukkala E, Pyrhönen S, Nevanlinna H (2000) Familial breast cancer in southern Finland: How prevalent are breast cancer families and can we trust the family history reported by patients? *Eur J Cancer* 36(9):1143–1148.
- Vehmanen P, et al. (1997) Low proportion of BRCA1 and BRCA2 mutations in Finnish breast cancer families: Evidence for additional susceptibility genes. *Hum Mol Genet* 6(13):2309–2315.
- Vahteristo P, et al. (2002) A CHEK2 genetic variant contributing to a substantial fraction of familial breast cancer. *Am J Hum Genet* 71(2):432–438.
- Vahteristo P, Eerola H, Tamminen A, Blomqvist C, Nevanlinna H (2001) A probability model for predicting BRCA1 and BRCA2 mutations in breast and breast-ovarian cancer families. *Br J Cancer* 84(5):704–708.
- Eerola H, et al. (2005) Histopathological features of breast tumours in BRCA1, BRCA2 and mutation-negative breast cancer families. *Breast Cancer Res* 7(1):R93–R100.
- Tommiska J, et al. (2008) The DNA damage signalling kinase ATM is aberrantly reduced or lost in BRCA1/BRCA2-deficient and ER/PR/ERBB2-triple-negative breast cancer. *Oncogene* 27(17):2501–2506.
- Sarantaus L, et al. (2001) BRCA1 and BRCA2 mutations among 233 unselected Finnish ovarian carcinoma patients. *Eur J Hum Genet* 9(6):424–430.
- Arason A, et al. (1998) A population study of mutations and LOH at breast cancer gene loci in tumours from sister pairs: Two recurrent mutations seem to account for all BRCA1/BRCA2 linked breast cancer in Iceland. *J Med Genet* 35(6):446–449.
- Li H, Durbin R (2010) Fast and accurate long-read alignment with Burrows-Wheeler transform. *Bioinformatics* 26(5):589–595.
- Li H, et al.; 1000 Genome Project Data Processing Subgroup (2009) The Sequence Alignment/Map format and SAMtools. *Bioinformatics* 25(16):2078–2079.
- Robinson JT, et al. (2011) Integrative genomics viewer. *Nat Biotechnol* 29(1):24–26.
- Cingolani P, et al. (2012) Using drosophila melanogaster as a model for genotoxic chemical mutational studies with a new program, SnpSift. *Front Genet* 3:35.





**Table S2. Genotype frequencies for variants that were included in phase I-II or I-III**

| Variation                           | Study cohort        | No. of individuals | WT    | %    | mut | %   | OR   | 95% CI     | P value |
|-------------------------------------|---------------------|--------------------|-------|------|-----|-----|------|------------|---------|
|                                     |                     |                    | GG    |      | GA  |     |      |            |         |
| RUVBL1 c.950G>A<br>p.Arg316His      | Helsinki region     |                    |       |      |     |     |      |            |         |
|                                     | Population control  | 1,273              | 1,273 | 100  | 0   | 0   | —    | —          | —       |
|                                     | Familial BC         | 1,076              | 1,074 | 99.8 | 2   | 0.2 | —    | —          | —       |
|                                     | Unselected BC       | 1,716              | 1,715 | 99.9 | 1   | 0.1 | —    | —          | —       |
|                                     | All BC              | 2,410              | 2,407 | 99.9 | 3   | 0.1 | —    | —          | —       |
|                                     | Unselected OC       | 551                | 550   | 99.8 | 1   | 0.2 | —    | —          | —       |
|                                     | Tampere region      |                    |       |      |     |     |      |            |         |
|                                     | Population control  | 810                | 810   | 100  | 0   | 0   | —    | —          | —       |
|                                     | Familial BC         | 254                | 254   | 100  | 0   | 0   | —    | —          | —       |
|                                     | All BC (unselected) | 675                | 675   | 100  | 0   | 0   | —    | —          | —       |
|                                     |                     |                    | TT    |      | TG  |     |      |            |         |
| FANCA c.4228T>G<br>p.Cys1410Gly     | Helsinki region     |                    |       |      |     |     |      |            |         |
|                                     | Population control  | 1,271              | 1,271 | 100  | 0   | 0   | —    | —          | —       |
|                                     | Familial BC         | 1,075              | 1,073 | 99.8 | 2   | 0.2 | —    | —          | —       |
|                                     | Unselected BC       | 1,714              | 1,714 | 100  | 0   | 0   | —    | —          | —       |
|                                     | All BC              | 2,408              | 2,406 | 99.9 | 2   | 0.1 | —    | —          | —       |
|                                     | Unselected OC       | 547                | 547   | 100  | 0   | 0   | —    | —          | —       |
|                                     | Tampere region      |                    |       |      |     |     |      |            |         |
|                                     | Population control  | 810                | 810   | 100  | 0   | 0   | —    | —          | —       |
|                                     | Familial BC         | 254                | 254   | 100  | 0   | 0   | —    | —          | —       |
|                                     | All BC (unselected) | 674                | 674   | 100  | 0   | 0   | —    | —          | —       |
|                                     |                     |                    | GG    |      | GC  |     |      |            |         |
| SLX4 c.2484G>C<br>p.Glu828Asp       | Helsinki region     |                    |       |      |     |     |      |            |         |
|                                     | Population control  | 1,270              | 1,264 | 99.5 | 6   | 0.5 | —    | —          | —       |
|                                     | Familial BC         | 1,064              | 1,059 | 99.5 | 5   | 0.5 | 0.99 | 0.30–3.27  | 1       |
|                                     | Unselected BC       | 1,713              | 1,708 | 99.7 | 5   | 0.3 | 0.62 | 0.19–2.03  | 0.5442  |
|                                     | All BC              | 2,396              | 2,388 | 99.7 | 8   | 0.3 | 0.71 | 0.24–2.04  | 0.5175  |
|                                     | Unselected OC       | 547                | 546   | 99.8 | 1   | 0.2 | 0.29 | 0.04–2.33  | 0.6817  |
|                                     | Tampere region      |                    |       |      |     |     |      |            |         |
|                                     | Population control  | 810                | 808   | 99.8 | 2   | 0.2 | —    | —          | —       |
|                                     | Familial BC         | 254                | 253   | 99.6 | 1   | 0.4 | 1.60 | 0.14–17.68 | 0.5591  |
|                                     | All BC (unselected) | 675                | 672   | 99.6 | 3   | 0.4 | 1.80 | 0.30–10.83 | 0.6641  |
|                                     |                     |                    | C     |      | CC* |     |      |            |         |
| NEIL1 c.314dupC<br>p.Pro106Alafs*50 | Helsinki region     |                    |       |      |     |     |      |            |         |
|                                     | Population control  | 1,274              | 1,266 | 99.4 | 8   | 0.6 | —    | —          | —       |
|                                     | Familial BC         | 1,085              | 1,080 | 99.5 | 5   | 0.5 | 0.73 | 0.11–10.18 | 0.7817  |
|                                     | Unselected BC       | 1,730              | 1,719 | 99.4 | 11  | 0.6 | 1.01 | 0.41–2.52  | 0.9785  |
|                                     | All BC              | 2,815              | 2,799 | 99.4 | 16  | 0.6 | 0.90 | 0.39–2.12  | 0.8174  |
|                                     | Tampere region      |                    |       |      |     |     |      |            |         |
|                                     | Population control  | 813                | 810   | 99.6 | 3   | 0.4 | —    | —          | —       |
|                                     | Familial BC         | 257                | 256   | 99.6 | 1   | 0.4 | 1.05 | 0.11–10.18 | 1       |
|                                     | All BC (unselected) | 678                | 670   | 98.8 | 8   | 1.2 | 3.22 | 0.85–12.20 | 0.0684  |
|                                     |                     |                    |       | GG   |     | GT  |      |            |         |
| MPG c.40–1G>T<br>p.?                | Helsinki region     |                    |       |      |     |     |      |            |         |
|                                     | Population control  | 1,272              | 1,261 | 99.1 | 11  | 0.9 | —    | —          | —       |
|                                     | Familial BC         | 1,075              | 1,062 | 98.8 | 13  | 1.2 | 1.40 | 0.63–3.15  | 0.4085  |
|                                     | Unselected BC       | 1,713              | 1,687 | 98.5 | 26  | 1.5 | 1.77 | 0.87–3.59  | 0.1108  |
|                                     | All BC              | 2,425              | 2,394 | 98.7 | 31  | 1.3 | 1.48 | 0.74–2.96  | 0.2597  |
|                                     | Unselected OC       | 548                | 540   | 98.5 | 8   | 1.5 | 1.70 | 0.68–4.26  | 0.2490  |
|                                     | Tampere region      |                    |       |      |     |     |      |            |         |
|                                     | Population control  | 809                | 797   | 98.5 | 12  | 1.5 | —    | —          | —       |
|                                     | Familial BC         | 254                | 251   | 98.8 | 3   | 1.2 | 0.79 | 0.22–2.84  | 1       |
|                                     | All BC (unselected) | 684                | 669   | 97.8 | 15  | 2.2 | 1.49 | 0.69–3.20  | 0.3052  |
|                                     |                     |                    | GG    |      | GA  |     |      |            |         |
| BARD1 c.2282G>A<br>p.Ser761Asn      | Helsinki region     |                    |       |      |     |     |      |            |         |
|                                     | Population control  | 549                | 539   | 98.2 | 10  | 1.8 | —    | —          | —       |
|                                     | Familial BC         | 505                | 494   | 97.8 | 11  | 2.2 | 1.20 | 0.51–2.85  | 0.6789  |
